# Supplementary material for: Prediction of functional decline in community-dwelling older persons in general practice: a cohort study
Source: Springer Nature journal article supplement (doi:10.1186/s12877-018-0826-z), 2018-06-11
Supplement: MOESM2 [file 15843104]

**Additional file 2: Appendix 2. Multivariate models to predict a relevant decline in functional status stratified by baseline GARS (n=2211)**

|         | group 1 <sup>a</sup><br>(n=735) |              |         | group 2 <sup>a</sup><br>(n=647) |              |         | group 3 <sup>a</sup><br>(n=418) |              |         | group 4 <sup>a</sup><br>(n=241) |              |         | group 5 <sup>a</sup><br>(n=110) |              |         | group 6 <sup>a</sup><br>(n=60) |              |         |
|---------|---------------------------------|--------------|---------|---------------------------------|--------------|---------|---------------------------------|--------------|---------|---------------------------------|--------------|---------|---------------------------------|--------------|---------|--------------------------------|--------------|---------|
|         | AUC                             | delta<br>AUC | p-value | AUC                             | delta<br>AUC | p-value | AUC                             | delta<br>AUC | p-value | AUC                             | delta<br>AUC | p-value | AUC                             | delta<br>AUC | p-value | AUC                            | delta<br>AUC | p-value |
| Model 1 | 0,602                           |              |         | 0,584                           |              |         | 0,540                           |              |         | 0,627                           |              |         | 0,638                           |              |         | 0,702                          |              |         |
| Model 2 | 0,635                           | 0,033        | 0.1651  | 0,586                           | 0,002        | 0.8619  | 0,577                           | 0,037        | 0.2483  | 0,648                           | 0,021        | 0.2295  | 0,662                           | 0,024        | 0.4783  | 0,709                          | 0,007        | 0.8349  |
| Model 3 | 0,654                           | 0,052        | 0.0353  | 0,632                           | 0,048        | 0.0913  | 0,578                           | 0,038        | 0.2483  | 0,635                           | 0,008        | 0.6455  | 0,675                           | 0,037        | 0.4056  | 0,721                          | 0,019        | 0.6383  |
| Model 4 | 0,637                           | 0,035        | 0.1773  | 0,659                           | 0,075        | 0.0172  | 0,602                           | 0,062        | 0.1035  | 0,693                           | 0,066        | 0.0329  | 0,664                           | 0,026        | 0.4887  | 0,750                          | 0,048        | 0.3224  |
| Model 5 | 0,671                           | 0,034        | 0.1119  | 0,680                           | 0,021        | 0.1530  | 0,628                           | 0,026        | 0.1077  | 0,700                           | 0,007        | 0.5683  | 0,706                           | 0,042        | 0.2356  | 0,773                          | 0,023        | 0.4913  |
| Model 6 | 0,668                           | 0,033        | 0.0801  | 0,628                           | 0,042        | 0.1144  | 0,613                           | 0,036        | 0.1906  | 0,668                           | 0,020        | 0.2236  | 0,698                           | 0,036        | 0.3880  | 0,739                          | 0,030        | 0.3183  |
| Model 7 | 0,653                           | 0,018        | 0.3596  | 0,658                           | 0,072        | 0.0232  | 0,633                           | 0,056        | 0.0874  | 0,701                           | 0,053        | 0.0720  | 0,688                           | 0,026        | 0.4738  | 0,766                          | 0,057        | 0.1813  |
| Model 8 | 0,682                           | 0,029        | 0.1108  | 0,681                           | 0,023        | 0.1053  | 0,653                           | 0,020        | 0.2058  | 0,715                           | 0,014        | 0.2915  | 0,726                           | 0,038        | 0.2512  | 0,775                          | 0,009        | 0.7462  |

Models | 1: Age and sex | 2: model 1 + polypharmacy, multimorbidity and living situation | 3: model 1 + ISCOPE-score | 4: model 1 + opinion of GP | 5: model 1 + ISCOPE-score + opinion of GP | 6: model 2 + ISCOPE-score | 7: model 2 + opinion of GP | 8: model 2 + ISCOPE-score + opinion of GP||

**<sup>a</sup>Change in GARS and number of participants stratified by baseline GARS (n=6)**

| Group No | Baseline GARS | Participants with valid delta GARS<br>n | delta GARS in 12 months<br>Median (IQR) | p90 decline in functional status <sup>#</sup> | participants died/<br>moved to NH<br>n | total participants<br>n |
|----------|---------------|-----------------------------------------|-----------------------------------------|-----------------------------------------------|----------------------------------------|-------------------------|
| 1        | 18-26         | 717                                     | 2 (0; 5)                                | 0.1969                                        | 18                                     | 735                     |
| 2        | 27-35         | 607                                     | 2 (-1; 7)                               | 0.2720                                        | 40                                     | 647                     |
| 3        | 36-45         | 377                                     | 3 (-1; 8)                               | 0.3939                                        | 41                                     | 418                     |
| 4        | 45-53         | 203                                     | 1 (-2; 5)                               | 0.4703                                        | 38                                     | 241                     |
| 5        | 54-62         | 74                                      | 1 (-3.35; 4)                            | 0.5359                                        | 36                                     | 110                     |
| 6        | 63-72         | 40                                      | 0 (-2; 2)                               | 1                                             | 20                                     | 60                      |

<sup>#</sup>p90 of score calculated with (GARS at 12 months – GARS at baseline) / (72-GARS at baseline)
